# Supplementary material for: Intravenous Thrombolysis in Patients With Ischemic Stroke and Recent Ingestion of Direct Oral Anticoagulants
Source: PubMed Central journal article supplement (PMC9857462; doi:10.1001/jamaneurol.2022.4782), 2023-01-03
Supplement: jamaneurol-e224782-s001.pdf [file jamaneurol-e224782-s001.pdf]

## Supplemental Online Content

Meinel TR, Wilson D, Gensicke H, et al; DOAC-IVT Writing Group; International DOAC-IVT, TRISP, and CRCS-K-NIH Collaboration. Intravenous thrombolysis in patients with ischemic stroke and recent ingestion of direct oral anticoagulants. *JAMA Neurol*. Published online January 3, 2023. doi:10.1001/jamaneurol.2022.4782

**eTable 1.** Search Strategy PubMed/EMBASE

**eTable 2.** Availability and Details of Standard Operating Procedures Regarding Intravenous Thrombolysis in Patients With Recent Ingestion of Direct Oral Anticoagulants

**eTable 3.** Baseline Characteristics Comparing Patients With Preceding DOAC Prescription According to IVT Status in Selected Centers

**eTable 4.** Patient Baseline Characteristics According to Occurrence of Symptomatic Intracranial Hemorrhage

**eTable 5.** Patient Baseline Characteristics According to Occurrence of Symptomatic Intracranial Hemorrhage Limited to DOAC Patients

**eTable 6.** Post Hoc Sensitivity Analyses for Outcomes of Patients With Acute Ischemic Stroke Treated With Intravenous Thrombolysis

**eTable 7.** Rates of Outcome Categories in the Modified Rankin Scale at 90 Days According to Group

**eTable 8.** Patient Baseline Characteristics According to Occurrence of Functional Independence (mRS Score of 0 to 2 at 90 Days)

**eTable 9.** Rates of Symptomatic Intracranial Hemorrhage According to Time From Last Ingestion of a Direct Oral Anticoagulant

**eTable 10.** Rates of Symptomatic Intracranial Hemorrhage According to Time From Symptom Onset to Needle According to DOAC Group

This supplementary material has been provided by the authors to give readers additional information about their work.

**eTable 1.** Search Strategy PubMed/EMBASE

|                                                                                                                                                        |                                                                                                                                                                                                                                                                                                                                                                                                                                                                                                                           |
|--------------------------------------------------------------------------------------------------------------------------------------------------------|---------------------------------------------------------------------------------------------------------------------------------------------------------------------------------------------------------------------------------------------------------------------------------------------------------------------------------------------------------------------------------------------------------------------------------------------------------------------------------------------------------------------------|
| <p><b>Concept 1<br/>(ischemic stroke)</b></p>                                                                                                          | <p>"Stroke"[Mesh] OR<br/>         "Cerebrovascular Disorders"[MeSh] OR "Intracranial Embolism and Thrombosis"[Mesh]</p> <p>OR</p> <p>"stroke"[title/abstract] OR<br/>         ischemic stroke[Title/Abstract] OR<br/>         brain infarction*[Title/Abstract]</p>                                                                                                                                                                                                                                                       |
| <p><b>AND</b></p>                                                                                                                                      |                                                                                                                                                                                                                                                                                                                                                                                                                                                                                                                           |
| <p><b>Concept 2<br/>(DOAC therapy)</b></p>                                                                                                             | <p>"Anticoagulants" [Mesh]<br/>         OR</p> <p>"DOAC" [title/abstract] OR<br/>         "NOAC"[title/abstract] OR<br/>         "direct oral anticoag*" [title/abstract] OR<br/>         "novel oral anticoag*" [title/abstract] OR<br/>         "anticoagul*" [title/abstract] OR<br/>         "rivaroxaban" [title/abstract] OR<br/>         "dabigatran" [title/abstract] OR<br/>         "apixaban" [title/abstract] OR<br/>         "edoxaban" [title/abstract] OR<br/>         "idarucizumab" [title/abstract]</p> |
| <p><b>AND</b></p>                                                                                                                                      |                                                                                                                                                                                                                                                                                                                                                                                                                                                                                                                           |
| <p><b>Concept 3<br/>(intravenous thrombolysis)</b></p>                                                                                                 | <p>"Thrombolytic Therapy" [Mesh]<br/>         OR</p> <p>"thrombolysis" [Title/Abstract] OR<br/>         "thrombolytics" [Title/Abstract] OR<br/>         "tPA" Title/Abstract] OR<br/>         "tissue plasminogen activator" [Title/Abstract] OR<br/>         "thrombolytics" [Title/Abstract] OR<br/>         "rt-PA" [Title/Abstract] OR<br/>         "Alteplase" [Title/Abstract] OR<br/>         "Tenecteplase" [Title/Abstract]</p>                                                                                 |
| <p><b>Filters:</b> (("2000/01/01"[PDAT] : "2021/31/07"[PDAT])<br/>         AND<br/>         "humans"[MeSH Terms] AND<br/>         (English[lang]))</p> |                                                                                                                                                                                                                                                                                                                                                                                                                                                                                                                           |

**eTable 2.** Availability and Details of Standard Operating Procedures Regarding Intravenous Thrombolysis in Patients With Recent Ingestion of Direct Oral Anticoagulants

| Center    | Number of DOAC-IVT cases | Number of IVT controls (without DOAC) | Number of DOAC cases not receiving IVT | Details on Standard Operating Procedure                                                                                                                                                                                                                                                                                                                                                                                                                                                                                           |
|-----------|--------------------------|---------------------------------------|----------------------------------------|-----------------------------------------------------------------------------------------------------------------------------------------------------------------------------------------------------------------------------------------------------------------------------------------------------------------------------------------------------------------------------------------------------------------------------------------------------------------------------------------------------------------------------------|
| Adelaide  | 29                       | 850                                   | 175                                    | thrombolyse without levels if >24 hours since ingestion, idarucizumab without waiting for levels if dabigatran ingestion known or suspected <24 hours and apixaban/rivaroxaban levels guiding thrombolysis if known or suspected ingestion <24 hours.                                                                                                                                                                                                                                                                             |
| Akershus  | 20                       | 988                                   | 49                                     | Dabigatran < 12 hours since last intake and not possible to reverse. Other DOACs - <24 hours since last intake. Relative contraindications Dabigatran, IVT may be given if > 12 hours and normal APTT and INR IVT may be given if reversal with anti-dot is possible. Other DOACs - IVT may be given if 24-48 hours since last intake and normal kidney function. (Decision also supported by normal INR, Thrombocytes count, APTT)                                                                                               |
| Amsterdam | 11                       | 1,236                                 |                                        |                                                                                                                                                                                                                                                                                                                                                                                                                                                                                                                                   |
| Auckland  | 10                       | 0                                     |                                        | Idarucizumab + Rivaroxaban Levels                                                                                                                                                                                                                                                                                                                                                                                                                                                                                                 |
| Basel     | 31                       | 1,607                                 | 463                                    | DOAC level based                                                                                                                                                                                                                                                                                                                                                                                                                                                                                                                  |
| Belgrad   | 0                        | 501                                   |                                        | Obtaining the data of DOAC intake for > 48 h or in case of < 48h - normal laboratory tests such as aPTT, INR, platelet count. The analysis of direct factor Xa activity has recently been introduced. The detection of DOAC plasma levels has not yet been introduced in our center's SOP.                                                                                                                                                                                                                                        |
| Berlin    | 17                       | 1,843                                 | 438                                    | If certain intake of DOACs > 24 hours and CrCL>50ml: IVT possible (information about off-label IVT use). If anamnesis unclear or intake of DOACs (other than dabigatran) < 24 h: IVT if INR (< 1.4), TZ and PT (Quick) are normal. Before praxbind available: If on dabigatran, aPTT above normal range OR medication ingested within 24 hours prior to lab drawn: no IVT. After praxbind available: if certain intake of dabigatran <24h IVT possible after administration of Praxbind 5g (information about off-label IVT use). |
| Bern      | 30                       | 1,466                                 | 456                                    | DOAC level based                                                                                                                                                                                                                                                                                                                                                                                                                                                                                                                  |
| Bologna   | 24                       | 316                                   |                                        | DOAC level based                                                                                                                                                                                                                                                                                                                                                                                                                                                                                                                  |
| Box Hill  | 0                        | 3                                     |                                        | At Box Hill, we do acute DOAC levels, and use cut-off as suggested in the Australian Stroke Guideline: dabigatran < 40 ng/mL, apixaban < 10 ng/mL and rivaroxaban < 100 ng/mL ( <a href="https://informme.org.au/Guidelines/Clinical-Guidelines-for-Stroke-Management">https://informme.org.au/Guidelines/Clinical-Guidelines-for-Stroke-Management</a> ).<br><br>Dabigatran --> praxbind and Xa threshold of <100ng/ml to give                                                                                                   |

|                                       |    |       |     |                                                                                                                                                                                                                                                            |
|---------------------------------------|----|-------|-----|------------------------------------------------------------------------------------------------------------------------------------------------------------------------------------------------------------------------------------------------------------|
| Brescia                               | 1  | 388   |     | DOAC level and reversal                                                                                                                                                                                                                                    |
| Christchurch                          | 40 | 639   |     | Only reversal with Idarucizumab possible                                                                                                                                                                                                                   |
| Dijon                                 | 5  | 408   |     | DOAC plasma levels in first line using the cut-off of 50 ng/ml (up to 100 ng/mL in some patients), according to the 2016 French Guideline                                                                                                                  |
| Erlangen                              | 43 | 0     | 334 | DOAC level based and reversal with idarucizumab                                                                                                                                                                                                            |
| Frankfurt Hoechst                     | 0  | 2     |     | For dabigatran > 30 ng/ml: idarucizumab, thrombolysis, thrombectomy (if necessary and no CI); For FXa inhibitor > 30 ng/ml: no lysis, thrombectomy (if no contraindications)                                                                               |
| Fuijan                                | 1  | 364   |     | Only if Idarucizumab possible, no DOAC levels                                                                                                                                                                                                              |
| German Multicenter                    | 80 | 0     |     | only Dabigatran cases (after availability of Idarucizumab)                                                                                                                                                                                                 |
| Gothenburg                            | 0  | 86    |     |                                                                                                                                                                                                                                                            |
| Heidelberg                            | 41 | 2,849 | 339 | Dabigatran: idarucizumab; all: DOAC level based                                                                                                                                                                                                            |
| Helsinki                              | 6  | 3,553 |     | Dabigatran: Idarucizumab, other DOACs: measurement of the activity, lab results within 20 mins. no use of andexanet                                                                                                                                        |
| Hong Kong                             | 4  | 94    | 29  | We exclude patient with last DOAC intake within 48 hours from IVT<br>For those with last intake within 48 hours or unknown onset time, we perform CTA and proceed to EVT for those with LVO<br>Hence included patients erroneous IVT.                      |
| Hospital Joan XXIII                   | 0  | 2     |     | DOAC reversal, no DOAC levels                                                                                                                                                                                                                              |
| Hospital Universitari Bellvitge (HUB) | 0  | 1     |     |                                                                                                                                                                                                                                                            |
| Japan Multicenter                     | 35 | 70    |     |                                                                                                                                                                                                                                                            |
| Jerusalem                             | 7  | 341   |     | We measure plasma DOAC level and XA or TT levels and we do have access to both andexanet and praxbind. We do not use reversal agents if TT and PTT are normal (for dabigatran) or if Xa is less than 0.5 and low plasma levels for apixaban or rivaroxaban |
| John Hunter                           | 4  | 144   | 107 |                                                                                                                                                                                                                                                            |
| Kansai                                | 9  | 139   |     |                                                                                                                                                                                                                                                            |
| Korea multicenter                     | 82 | 5,857 | 378 |                                                                                                                                                                                                                                                            |
| LMU Munich                            | 21 | 0     |     |                                                                                                                                                                                                                                                            |
| Larissa                               | 4  | 36    |     |                                                                                                                                                                                                                                                            |
| Lausanne                              | 30 | 1,075 | 293 | DOAC level based                                                                                                                                                                                                                                           |
| Lille                                 | 4  | 1,515 |     | DOAC level based and reversal with idarucizumab                                                                                                                                                                                                            |
| Lisbon                                | 4  | 0     |     | IVT contraindicated if anti-Xa taken <48h; If anti-IIa taken <48h-->first option direct MT; if not eligible for MT, IVT after reversal with idarucizumab. At the moment: if anti-Xa or IIa taken <48h--->first option direct MT; if not eligible           |

|                 |    |       |     |                                                                                                                                                                                                                                                                                                                                                                                                                                                                                                                                                                                                                                                                                                                                                                                                                                                                                                                                        |
|-----------------|----|-------|-----|----------------------------------------------------------------------------------------------------------------------------------------------------------------------------------------------------------------------------------------------------------------------------------------------------------------------------------------------------------------------------------------------------------------------------------------------------------------------------------------------------------------------------------------------------------------------------------------------------------------------------------------------------------------------------------------------------------------------------------------------------------------------------------------------------------------------------------------------------------------------------------------------------------------------------------------|
|                 |    |       |     | for MT: IVT if anti-Xa < 50ng/ml or anti-IIa with TT < 60s; if anti-II with TT > 60s IVT after reversal with idarucizumab; IVT after reversal with andexanet alfa not considered.                                                                                                                                                                                                                                                                                                                                                                                                                                                                                                                                                                                                                                                                                                                                                      |
| Lugano          | 10 | 126   | 159 |                                                                                                                                                                                                                                                                                                                                                                                                                                                                                                                                                                                                                                                                                                                                                                                                                                                                                                                                        |
| Mainz           | 3  | 0     | 87  | DOAC plasma levels + reversal                                                                                                                                                                                                                                                                                                                                                                                                                                                                                                                                                                                                                                                                                                                                                                                                                                                                                                          |
| Modena          | 4  | 1,288 |     |                                                                                                                                                                                                                                                                                                                                                                                                                                                                                                                                                                                                                                                                                                                                                                                                                                                                                                                                        |
| München/TUM     | 6  | 0     |     | Only if Idarucizumab possible                                                                                                                                                                                                                                                                                                                                                                                                                                                                                                                                                                                                                                                                                                                                                                                                                                                                                                          |
| Osaka           | 41 | 0     |     | Japanese guidelines                                                                                                                                                                                                                                                                                                                                                                                                                                                                                                                                                                                                                                                                                                                                                                                                                                                                                                                    |
| Paris           | 4  | 0     |     |                                                                                                                                                                                                                                                                                                                                                                                                                                                                                                                                                                                                                                                                                                                                                                                                                                                                                                                                        |
| Perugia         | 7  | 0     |     | Advised performing plasma levels on all people with stroke taking DOAC with last intake > 2 hours before, reversal advised in case of dabigatran. No threshold defined for thrombolysis with other DOACs. If DOAC taken < 2h no test advised, no IVT as for recommendations.                                                                                                                                                                                                                                                                                                                                                                                                                                                                                                                                                                                                                                                           |
| Reggio Emilia   | 7  | 578   |     | DOAC plasma levels                                                                                                                                                                                                                                                                                                                                                                                                                                                                                                                                                                                                                                                                                                                                                                                                                                                                                                                     |
| Royal Melbourne | 18 | 866   |     |                                                                                                                                                                                                                                                                                                                                                                                                                                                                                                                                                                                                                                                                                                                                                                                                                                                                                                                                        |
| St. Gallen      | 28 | 201   |     | Depends on anti-Xa activity (100ng/ml) or thrombin time < 20sec in case of dabigatran treatment. No use of reversal agents before IVT so far.                                                                                                                                                                                                                                                                                                                                                                                                                                                                                                                                                                                                                                                                                                                                                                                          |
| Tübingen        | 8  | 188   |     | DOAC level/POC INR                                                                                                                                                                                                                                                                                                                                                                                                                                                                                                                                                                                                                                                                                                                                                                                                                                                                                                                     |
| UCLH            | 2  | 0     | 34  |                                                                                                                                                                                                                                                                                                                                                                                                                                                                                                                                                                                                                                                                                                                                                                                                                                                                                                                                        |
| UKE Hamburg     | 10 | 0     |     | Dabigatran with idarucizumab. DOAC level/activity measurements in our SOP for lysis not provided -- > no lysis for Xa inhibitors < 48h                                                                                                                                                                                                                                                                                                                                                                                                                                                                                                                                                                                                                                                                                                                                                                                                 |
| Umbria          | 1  | 0     |     |                                                                                                                                                                                                                                                                                                                                                                                                                                                                                                                                                                                                                                                                                                                                                                                                                                                                                                                                        |
| Wellington      | 45 | 2,595 |     | If Dabigatran within last 48 hours and/or abnormal TT give 5g Idarucizumab. Wait 5min treat. If Rivaroxaban/Apixaban within last 48 hrs don't thrombolys. Warfarin needs an INR < 1.7z                                                                                                                                                                                                                                                                                                                                                                                                                                                                                                                                                                                                                                                                                                                                                 |
| Zürich          | 2  | 203   | 296 | If medication is taken certainly > 4 hours before lab and normal kidney function, lysis is justifiable with benefit-risk assessment (off-label): a. Rivaroxaban: anti-Factor Xa activity (Rivaroxaban) < 100 µg/L Can be determined in the emergency laboratory and without consulting of Haematology. Lysis acceptable with anti-Factor Xa activity (Rivaroxaban) < 100 µg/L. b. Apixaban: anti-factor Xa activity (LMWH) normal (=0), with slightly increased values in consultation with hematology lysis decision based on this; also always anti-factor Xa activity (Apixaban) set (approx. 1.5h). Lysis acceptable with anti-factor Xa activity (apixaban) < 40 µg/l. c. Dabigatran: thrombin time normal or moderate after individual benefit-risk assessment Thrombin time prolongation (< 4x upper limit of normal). In consultation with hematology lysis decision based on this; also always allow anti-factor IIa activity |

|  |     |        |                                                                                                                                       |                                                                                                                                                                                                                                                                                                                                                                                                                                                                                                                                                                                                                                                                                                                                                                                                                                                                                                                                                                                                                                                                                                                                                                                                                                                     |
|--|-----|--------|---------------------------------------------------------------------------------------------------------------------------------------|-----------------------------------------------------------------------------------------------------------------------------------------------------------------------------------------------------------------------------------------------------------------------------------------------------------------------------------------------------------------------------------------------------------------------------------------------------------------------------------------------------------------------------------------------------------------------------------------------------------------------------------------------------------------------------------------------------------------------------------------------------------------------------------------------------------------------------------------------------------------------------------------------------------------------------------------------------------------------------------------------------------------------------------------------------------------------------------------------------------------------------------------------------------------------------------------------------------------------------------------------------|
|  |     |        |                                                                                                                                       | <p>dabigatran to develop (approx. 1.5 h). Lysis acceptable with anti-factor IIa activity (dabigatran) &lt;50 ng/ml (&lt;0.05 µg/ml). at Dabigatran levels &gt;0.05 µg/ml (&gt;50 ng/ml) or medication intake &lt;4h can lead to lysis immediately preceding antagonism with idarucizumab (Praxbind® , standard dose 5 g IV) be considered. i.e. Edoxaban: anti-factor Xa activity (LMWH) normal (=0), with slightly increased values in RS with YES hematology lysis decision based on this; also always anti-factor Xa activity Allow edoxaban to set in (approx. 1.5 hours). A specific anti-Fxa test is now available for edoxaban Disposal; there are still no recommendations regarding a limit value for the lysis test. e. Unknown anticoagulant Quick/INR, thrombin time, anti-factor Xa activity (LMWH) normal → not relevant Plasma concentration of VKA, heparins, anti-FXa or thrombin antagonists f. VKA antagonists (Marcoumar, Sintrom, Warfarin): Lysis with rtPA acceptable from INR ≤1.7. Note: • Considerable delay in DOAC elimination possible in the case of renal insufficiency • If blood is taken very shortly after ingestion (&lt;2-4 hours), the maximum Adjust plasma levels of a DOAC only after blood collection</p> |
|  |     |        | The difference between the number of study centers in the manuscripts and listed here is due to the inclusion of multicenter cohorts. |                                                                                                                                                                                                                                                                                                                                                                                                                                                                                                                                                                                                                                                                                                                                                                                                                                                                                                                                                                                                                                                                                                                                                                                                                                                     |
|  | 832 | 32,375 |                                                                                                                                       |                                                                                                                                                                                                                                                                                                                                                                                                                                                                                                                                                                                                                                                                                                                                                                                                                                                                                                                                                                                                                                                                                                                                                                                                                                                     |

**eTable 3.** Baseline Characteristics Comparing Patients With Preceding DOAC Prescription According to IVT Status in Selected Centers

|                                                                                                                     | DOAC patients not receiving IVT (N= 3,603) | Patients with recent ingestion of DOACs receiving IVT (N=348) | <i>P</i> |
|---------------------------------------------------------------------------------------------------------------------|--------------------------------------------|---------------------------------------------------------------|----------|
| Median age – yrs (SD)                                                                                               | 81 (75-86)                                 | 78 (72-85)                                                    | <0.001   |
| Female sex – yes (%)                                                                                                | 1771 (49%)                                 | 164 (47%)                                                     | 0.47     |
| Median NIHSS score (IQR) <sup>a</sup>                                                                               | 7 (3-15)                                   | 10 (6-17)                                                     | <0.001   |
| Median pre-stroke score on the modified Rankin Scale (IQR) <sup>b</sup>                                             | 1 (0-2)                                    | 1 (0-1)                                                       | <0.001   |
| Mean systolic blood pressure – mmHg (SD)                                                                            | 154 (28)                                   | 156 (29)                                                      | 0.33     |
| Median time from symptom onset to hospital admission – h (IQR)                                                      | 2.7 (1.3-7.1)                              | 1.6 (1-2.9)                                                   | <0.001   |
| Mean blood glucose level – mmol/L (SD)                                                                              | 7.8 (3.1)                                  | 7.4 (2.6)                                                     | 0.045    |
| Median international normalized ratio – (IQR)                                                                       | 1.3 (1.1-1.8)                              | 1.1 (1.02-1.2)                                                | <0.001   |
| <b>Risk factors and medication<sup>c</sup></b>                                                                      |                                            |                                                               |          |
| Arterial hypertension – yes (%)                                                                                     | 3111 (86%)                                 | 278 (80%)                                                     | <0.001   |
| Current smoking – yes (%)                                                                                           | 292 (8.5%)                                 | 41 (11.9%)                                                    | 0.03     |
| History of hypercholesterolemia – yes (%)                                                                           | 1991 (56%)                                 | 174 (50%)                                                     | 0.046    |
| Diabetes Mellitus – yes (%)                                                                                         | 1050 (29%)                                 | 98 (28%)                                                      | 0.75     |
| Presence of large vessel occlusion – yes (%)                                                                        | 1617 (45%)                                 | 201 (60%)                                                     | <0.001   |
| Mechanical thrombectomy – yes (%)                                                                                   | 878 (27%)                                  | 135 (39%)                                                     | <0.001   |
| Restricted to centers that provided both DOAC patients that underwent and did not undergo intravenous thrombolysis. |                                            |                                                               |          |

**eTable 4.** Patient Baseline Characteristics According to Occurrence of Symptomatic Intracranial Hemorrhage

|                                                                         | N available | No symptomatic Intracranial Hemorrhage (N=31,522) | Symptomatic Intracranial Hemorrhage (N=1,345) | P      |
|-------------------------------------------------------------------------|-------------|---------------------------------------------------|-----------------------------------------------|--------|
| Median age – yrs (IQR)                                                  | 32,859      | 72 (62-80)                                        | 75 (67.7-82)                                  | <0.001 |
| Female sex – yes (%)                                                    | 32,860      | 13,710 (43.5%)                                    | 609 (45.3%)                                   | 0.20   |
| Geographical region                                                     | 32,867      |                                                   |                                               | <0.001 |
| Europe – no. (%)                                                        |             | 19,970 (63.4%)                                    | 992 (73.8%)                                   |        |
| Asia – no. (%)                                                          |             | 6,500 (20.6%)                                     | 198 (14.7%)                                   |        |
| Australia/New Zealand – no. (%)                                         |             | 5,052 (16.0%)                                     | 155 (11.5%)                                   |        |
| Median NIHSS score (IQR) <sup>a</sup>                                   | 32,593      | 9 (5-15)                                          | 13 (8-18)                                     | <0.001 |
| Median pre-stroke score on the modified Rankin Scale (IQR) <sup>b</sup> | 28,758      | 0 (0-0)                                           | 0 (0-0)                                       | <0.001 |
| Mean systolic blood pressure – mmHg (SD)                                | 28,922      | 154 (28)                                          | 158 (27)                                      | <0.001 |
| Mean blood glucose level – mmol/L (SD)                                  | 28,459      | 7.38 (2.66)                                       | 8.06 (3.20)                                   | <0.001 |
| Median international normalized ratio – (IQR)                           | 17,285      | 1 (1-1.1)                                         | 1 (1-1.1)                                     | 0.009  |
| <b>Risk factors and medication<sup>c</sup></b>                          |             |                                                   |                                               |        |
| Arterial hypertension – yes (%)                                         | 32,739      | 19,553 (62.3%)                                    | 929 (69.4%)                                   | <0.001 |
| Current smoking – yes (%)                                               | 30,219      | 5,687 (19.6%)                                     | 174 (15.3%)                                   | <0.001 |
| History of hypercholesterolemia – yes (%)                               | 32,682      | 11,827 (37.7%)                                    | 509 (38.3%)                                   | 0.69   |
| Diabetes Mellitus – yes (%)                                             | 32,717      | 6,109 (19.5%)                                     | 326 (24.3%)                                   | <0.001 |
| Antiplatelet therapy – yes/no. (%)                                      | 29,624      | 9,824 (34.6%)                                     | 554 (44.9%)                                   | <0.001 |



|                                                |            |                |                |                |
|------------------------------------------------|------------|----------------|----------------|----------------|
| Presence of large vessel occlusion – yes (%)   | 32,7<br>29 | 10,343 (33.0%) | 561 (41.7%)    | <0.<br>00<br>1 |
| Mechanical thrombectomy – yes (%)              | 32,4<br>95 | 6,032 (19.4%)  | 318 (23.7%)    | <0.<br>00<br>1 |
| Vitamin K antagonists                          | 32,8<br>67 | 647 ( 2.1%)    | 34 ( 2.5%)     | 0.2<br>3       |
| Recent ingestion of direct oral anticoagulants | 32,8<br>67 | 811 ( 2.6%)    | 21 ( 1.6%)     | 0.0<br>21      |
| Direct oral anticoagulants, plasma level ng/ml | 244        | 23 (7.5-48.98) | 18 (4.59-55.5) | 0.8<br>0       |
| Time from symptom onset to needle, min         | 29,4<br>58 | 138 (98-190)   | 143 (104-194)  | 0.0<br>24      |

**eTable 5.** Patient Baseline Characteristics According to Occurrence of Symptomatic Intracranial Hemorrhage Limited to DOAC Patients

|                                                                         | N available | No symptomatic Intracranial Hemorrhage (n= N=811) | Symptomatic Intracranial Hemorrhage (N=21) | P     |
|-------------------------------------------------------------------------|-------------|---------------------------------------------------|--------------------------------------------|-------|
| Mean age – yrs (SD)                                                     | 832         | 78 (71-85)                                        | 80 (74-84)                                 | 0.39  |
| Female sex – yes (%)                                                    | 832         | 345 (42.5%)                                       | 10 (47.6%)                                 | 0.64  |
| Geographical region                                                     | 832         |                                                   |                                            | 0.54  |
| Europe – no. (%)                                                        |             | 460 (56.7%)                                       | 14 (66.7%)                                 |       |
| Asia – no. (%)                                                          |             | 204 (25.2%)                                       | 5 (23.8%)                                  |       |
| Australia/New Zealand – no. (%)                                         |             | 147 (18.1%)                                       | 2 (9.5%)                                   |       |
| Median NIHSS score (IQR) <sup>a</sup>                                   | 828         | 11 (6-17)                                         | 11 (9-15)                                  | 0.58  |
| Median pre-stroke score on the modified Rankin Scale (IQR) <sup>b</sup> | 749         | 0 (0-1)                                           | 1 (0-1.5)                                  | 0.49  |
| Mean systolic blood pressure – mmHg (SD)                                | 746         | 154.117 (26.6421)                                 | 149.333 (25.4093)                          | 0.42  |
| Mean blood glucose level – mmol/L (SD)                                  | 745         | 7.38562 (2.52458)                                 | 7.04648 (1.44313)                          | 0.55  |
| Median international normalized ratio – (IQR)                           | 674         | 1.1 (1.02-1.2)                                    | 1.1 (1-1.2)                                | 0.91  |
| <b>Risk factors and medication<sup>c</sup></b>                          |             |                                                   |                                            |       |
| Arterial hypertension – yes (%)                                         | 752         | 552 (75.5%)                                       | 13 (61.9%)                                 | 0.15  |
| Current smoking – yes (%)                                               | 742         | 94 (13.0%)                                        | 1 (5.0%)                                   | 0.29  |
| History of hypercholesterolemia – yes (%)                               | 745         | 312 (43.1%)                                       | 10 (47.6%)                                 | 0.68  |
| Diabetes Mellitus – yes (%)                                             | 746         | 168 (23.2%)                                       | 5 (23.8%)                                  | 0.95  |
| Antiplatelet therapy – yes/no. (%)                                      | 787         | 84 (11.0%)                                        | 4 (19.0%)                                  | 0.25  |
| Presence of large vessel occlusion – yes (%)                            | 770         | 440 (58.7%)                                       | 14 (66.7%)                                 | 0.47  |
| Mechanical thrombectomy – yes (%)                                       | 832         | 273 (33.7%)                                       | 12 (57.1%)                                 | 0.025 |

|                                                   |     |                   |                  |          |
|---------------------------------------------------|-----|-------------------|------------------|----------|
| Direct oral anticoagulants,<br>plasma level ng/ml | 244 | 23 (7.5-48.98)    | 18 (4.59-55.5)   | 0.<br>80 |
| Low Dose alteplase                                | 781 | 204 (26.8%)       | 5 (23.8%)        | 0.<br>76 |
| Time from symptom onset to<br>needle, min         | 632 | 154.5 (111.5-210) | 111.5 (74.5-215) | 0.<br>14 |

**eTable 6.** Post Hoc Sensitivity Analyses for Outcomes of Patients With Acute Ischemic Stroke Treated With Intravenous Thrombolysis

|                                                                                                                                                                                                                                                    | Unadjusted rate DOAC group with confidence interval | Unadjusted rate control group with confidence interval                           | Adjusted Odds Ratio of association of recent DOAC ingestion with symptomatic intracranial hemorrhage                     |
|----------------------------------------------------------------------------------------------------------------------------------------------------------------------------------------------------------------------------------------------------|-----------------------------------------------------|----------------------------------------------------------------------------------|--------------------------------------------------------------------------------------------------------------------------|
| Excluding control cases from prior to the collection period of DOAC cases (before 2013)                                                                                                                                                            | 2.5% (1.6–3.8),<br>N=832                            | 4.1% (3.8–4.3),<br>N=29,732                                                      | 0.57 (0.36-0.91)<br>P=0.019                                                                                              |
| Excluding VKA patients (with an INR <1.7) from the control group                                                                                                                                                                                   | 2.5% (1.6–3.8),<br>N=832                            | 4.1% (3.9–4.3),<br>N= 31,354                                                     | 0.57 (0.36-0.91)<br>P=0.02                                                                                               |
| Adding mechanical thrombectomy to the model                                                                                                                                                                                                        |                                                     |                                                                                  | 0.54 (0.34-0.87)<br>P=0.01                                                                                               |
| Adding large-vessel occlusion to the model                                                                                                                                                                                                         |                                                     |                                                                                  | 0.55 (0.35-0.88)<br>P=0.01                                                                                               |
| Adding concomitant antiplatelet therapy to the model                                                                                                                                                                                               |                                                     |                                                                                  | 0.65 (0.41-1.04)<br>P=0.072                                                                                              |
| Adding atrial fibrillation to the model                                                                                                                                                                                                            |                                                     |                                                                                  | 0.46 (0.27-0.81)<br>P=0.007                                                                                              |
| Restricted to patients with documented time from last ingestion to admission                                                                                                                                                                       |                                                     | Combined (n=503)<br><br><12h (n=242)<br><br>12-24h (n=158)<br><br>24-48h (n=103) | 0.62 (0.35-1.1),<br>P=0.11<br>0.59 (0.24-1.47),<br>P=0.26<br>0.45 (0.14-1.41),<br>P=0.17<br>0.93 (0.34-2.56),<br>P=0.892 |
| Documented DOAC plasma levels >100ng/ml or proven ingestion <12 hours before IVT and without Idarucizumab                                                                                                                                          |                                                     | Yes (n=118)<br><br>No (n=714)                                                    | 0.69 (0.25-1.9),<br>P=0.472<br>0.55 (0.33-0.93),<br>P=0.025                                                              |
| Results show the rate (with 95% confidence interval) and the adjusted odds ratio in the fully adjusted model for the association of recent ingestion of a direct oral anticoagulant with the primary outcome (symptomatic intracranial hemorrhage) |                                                     |                                                                                  |                                                                                                                          |

**eTable 7.** Rates of Outcome Categories in the Modified Rankin Scale at 90 Days According to Group

| <b>Modified Rankin Scale Category</b> | <b>Patients with recent ingestion of DOACs (n= 664)</b> | <b>Controls (n= 29,026)</b> |
|---------------------------------------|---------------------------------------------------------|-----------------------------|
| 0                                     | 89 (13.4%)                                              | 5,861 (20.2%)               |
| 1                                     | 106 (16.0%)                                             | 5,963 (20.5%)               |
| 2                                     | 104 (15.7%)                                             | 4,642 (16.0%)               |
| 3                                     | 110 (16.6%)                                             | 3,998 (13.8%)               |
| 4                                     | 82 (12.4%)                                              | 3,103 (10.7%)               |
| 5                                     | 54 (8.1%)                                               | 1,623 (5.6%)                |
| 6                                     | 119 (17.9%)                                             | 3,836 (13.2%)               |

**eTable 8.** Patient Baseline Characteristics According to Occurrence of Functional Independence (mRS Score of 0 to 2 at 90 Days)

|                                                                         | N available | Poor Outcome at 90 days mRS 3-6 (N=12,925) | Functional Independence at 90 days mRS 0-2 (N=16,765) | P      |
|-------------------------------------------------------------------------|-------------|--------------------------------------------|-------------------------------------------------------|--------|
| Median age – yrs (IQR)                                                  | 29,687      | 77 (68-84)                                 | 69 (58-77)                                            | <0.001 |
| Female sex – yes (%)                                                    | 29,685      | 6,457 (50.0%)                              | 6,520 (38.9%)                                         | <0.001 |
| Geographical region                                                     | 29,690      |                                            |                                                       | 0.33   |
| Europe – no. (%)                                                        |             | 8,755 (67.7%)                              | 11,277 (67.3%)                                        |        |
| Asia – no. (%)                                                          |             | 2,603 (20.1%)                              | 3,359 (20.0%)                                         |        |
| Australia/New Zealand – no. (%)                                         |             | 1,567 (12.1%)                              | 2,129 (12.7%)                                         |        |
| Median NIHSS score (IQR) <sup>a</sup>                                   | 29,581      | 14 (8-19)                                  | 6 (4-11)                                              | <0.001 |
| Median pre-stroke score on the modified Rankin Scale (IQR) <sup>b</sup> | 27,206      | 0 (0-1)                                    | 0 (0-0)                                               | <0.001 |
| Mean systolic blood pressure – mmHg (SD)                                | 26,977      | 155 (30.9)                                 | 154 (25.6)                                            | 0.002  |
| Mean blood glucose level – mmol/L (SD)                                  | 26,656      | 7.8 (2.9)                                  | 7.1 (2.4)                                             | <0.001 |
| Median international normalized ratio – (IQR)                           | 16,659      | 1.02 (1-1.1)                               | 1 (.99-1.1)                                           | <0.001 |
| <b>Risk factors and medication<sup>c</sup></b>                          |             |                                            |                                                       |        |
| Arterial hypertension – yes (%)                                         | 29,627      | 9,045 (70.2%)                              | 10,058 (60.1%)                                        | <0.001 |
| Current smoking – yes (%)                                               | 27,154      | 1,799 (15.4%)                              | 3,640 (23.5%)                                         | <0.001 |
| History of hypercholesterolemia – yes (%)                               | 29,572      | 4,809 (37.4%)                              | 6,683 (40.0%)                                         | <0.001 |
| Diabetes Mellitus – yes (%)                                             | 29,605      | 3,154 (24.5%)                              | 2,788 (16.7%)                                         | <0.001 |
| Antiplatelet therapy – yes/no. (%)                                      | 27,570      | 4,777 (39.6%)                              | 5,072 (32.7%)                                         | <0.001 |

|                                              |        |               |               |        |
|----------------------------------------------|--------|---------------|---------------|--------|
| Presence of large vessel occlusion – yes (%) | 29,566 | 5,368 (41.8%) | 4,749 (28.4%) | <0.001 |
| Mechanical thrombectomy – yes (%)            | 29,318 | 3,100 (24.2%) | 2,761 (16.7%) | <0.001 |
| Time from symptom onset to needle, min       | 26,746 | 140 (100-188) | 135 (95-186)  | <0.001 |

**eTable 9.** Rates of Symptomatic Intracranial Hemorrhage According to Time From Last Ingestion of a Direct Oral Anticoagulant

| <b>Time from last ingestion of DOAC</b>       | <b>All patients</b>                           | <b>DOAC plasma levels measured</b> | <b>Neither known levels nor Idarucizumab</b> | <b>Idarucizumab</b> |
|-----------------------------------------------|-----------------------------------------------|------------------------------------|----------------------------------------------|---------------------|
| <12 h                                         | 2.9%, 1.1-5.9%                                | 5.1%, 0.6-17.3%                    | 4.1%, 0.9-11.5%                              | 1.5%, 0.02-5.4%     |
| 12–24 h                                       | 1.9%, 0.4-5.4%                                | 2.1%, 0.01-11.1%                   | 1.3%, 0.01-6.9%                              | 3.1, 0.01-16.2%     |
| 24–48 h                                       | 3.9%, 1.1-9.6%                                | 2.3%, 0.01-12.3%                   | 5.1%, 1.1-14.1%                              | 0%, 0-98%           |
| Exact time point unknown, but certainly <48 h | 2.1%, 0.9-4.3%                                | 3.2%, 0.01-9.0%                    | 1.3%, 0.8-6.9%                               | 0%, 0-4.1%          |
|                                               | Symptomatic intracranial hemorrhage %, 95% CI |                                    |                                              |                     |



**eTable 10.** Rates of Symptomatic Intracranial Hemorrhage According to Time From Symptom Onset to Needle According to DOAC Group

|                                    | <b>DOAC</b>                   | <b>Controls</b>                   |
|------------------------------------|-------------------------------|-----------------------------------|
| <b>0-3h</b>                        | siCH 2.8%, 1.5-4.9%,<br>n=422 | siCH 3.8%, 3.5-4.1%,<br>N= 20,898 |
| <b>3-4.5h</b>                      | siCH 0.6%, 0.0-3.6%,<br>n=51  | siCH 3.9%, 3.5-4.5%,<br>N= 6,507  |
| <b>extended<br/>window/wake-up</b> | siCH 3.1%, 1.3-6.0%,<br>n=258 | siCH 4.3%, 3.3-5.5%,<br>N= 1,421  |
