# Supplementary material for: Intravenous Thrombolysis in Patients With Ischemic Stroke and Recent Ingestion of Direct Oral Anticoagulants
Source: PubMed Central journal article supplement (PMC9857462; doi:10.1001/jamaneurol.2022.4782), 2023-01-03
Supplement: jamaneurol-e224782-s002.pdf [file jamaneurol-e224782-s002.pdf]

\*First name, last name, and suffix (if applicable) are required and will appear in PubMed.

| <b>*Group Name(s): International DOAC-IVT, TRISP, and CRCS-K-NIH Collaboration</b> |                   |                              |                  |                                                                                                           |                                          |                                                         |                                                                                            |
|------------------------------------------------------------------------------------|-------------------|------------------------------|------------------|-----------------------------------------------------------------------------------------------------------|------------------------------------------|---------------------------------------------------------|--------------------------------------------------------------------------------------------|
| <b>*First Name and Middle Initial(s)</b>                                           | <b>*Last Name</b> | <b>*Suffix (eg, Jr, III)</b> | Academic Degrees | Institution                                                                                               | Location (city, state/province, country) | Role or Contribution, eg, chair, principal investigator | Group (if more than 1 Group listed in the byline) and/or Subgroup (eg, Steering Committee) |
| Martina                                                                            | Goeldlin          |                              | MD               | Department of Neurology, Inselspital, Bern University Hospital, and University of Bern, Switzerland.      |                                          |                                                         | DOAC-IVT                                                                                   |
| Bernhard                                                                           | Siepen            |                              | MD               | Department of Neurology, Inselspital, Bern University Hospital, and University of Bern, Switzerland.      |                                          |                                                         | DOAC-IVT                                                                                   |
| Madlaine                                                                           | Mueller           |                              | MD               | Department of Neurology, Inselspital, Bern University Hospital, and University of Bern, Switzerland.      |                                          |                                                         | DOAC-IVT                                                                                   |
| Morin                                                                              | Beyeler           |                              | MD               | Department of Neurology, Inselspital, Bern University Hospital, and University of Bern, Switzerland.      |                                          |                                                         | DOAC-IVT                                                                                   |
| Adrian                                                                             | Scutelnic         |                              | MD               | Department of Neuroradiology, Inselspital, Bern University Hospital, and University of Bern, Switzerland. |                                          |                                                         | DOAC-IVT                                                                                   |
| Simon                                                                              | Jung              |                              | MD               | Department of Neurology, Inselspital, Bern University Hospital, and University of Bern, Switzerland.      |                                          |                                                         | DOAC-IVT                                                                                   |
| Adnan                                                                              | Mujanovic         |                              | MD               | Department of Neuroradiology, Inselspital, Bern University Hospital, and University of Bern, Switzerland. |                                          |                                                         | DOAC-IVT                                                                                   |
| Christoph                                                                          | Kurmann           |                              | MD               | Department of Neuroradiology, Inselspital, Bern University Hospital, and University of Bern, Switzerland. |                                          |                                                         | DOAC-IVT                                                                                   |

## Supplemental Online Content: Nonauthor Collaborators

\*First name, last name, and suffix (if applicable) are required and will appear in PubMed.

| *First Name and Middle Initial(s) | *Last Name     | *Suffix (eg, Jr, III) | Academic Degrees | Institution                                                                                               | Location (city, state/province, country) | Role or Contribution, eg, chair, principal investigator | Group (if more than 1 Group listed in the byline) and/or Subgroup (eg, Steering Committee) |
|-----------------------------------|----------------|-----------------------|------------------|-----------------------------------------------------------------------------------------------------------|------------------------------------------|---------------------------------------------------------|--------------------------------------------------------------------------------------------|
| Tomas                             | Dobrocky       |                       | MD               | Department of Neuroradiology, Inselspital, Bern University Hospital, and University of Bern, Switzerland. |                                          |                                                         | DOAC-IVT                                                                                   |
| Eike                              | Piechoviak     |                       | MD               | Department of Neuroradiology, Inselspital, Bern University Hospital, and University of Bern, Switzerland. |                                          |                                                         | DOAC-IVT                                                                                   |
| Roland                            | Wiest          |                       | MD               | Department of Neuroradiology, Inselspital, Bern University Hospital, and University of Bern, Switzerland. |                                          |                                                         | DOAC-IVT                                                                                   |
| Arsany                            | Hakim          |                       | MD               | Department of Neuroradiology, Inselspital, Bern University Hospital, and University of Bern, Switzerland. |                                          |                                                         | DOAC-IVT                                                                                   |
| Philipp                           | Bücke          |                       | MD               | Department of Neurology, Inselspital, Bern University Hospital, and University of Bern, Switzerland.      |                                          |                                                         | DOAC-IVT                                                                                   |
| Zaritzky                          | Jana           |                       | MD               | Department of Neurology, Klinikum Frankfurt Höchst, Germany                                               |                                          |                                                         | TRISP                                                                                      |
| Lichti                            | Carmen         |                       | MD               | Department of Neurology, Klinikum Frankfurt Höchst, Germany                                               |                                          |                                                         | TRISP                                                                                      |
| Dmytrow                           | Diana Isabella |                       | MD               | Clinical Study Coordination Office, Klinikum Frankfurt Höchst, Germany                                    |                                          |                                                         | TRISP                                                                                      |
| João Nuno                         | Ramos          |                       | MD               | Department of Neuroradiology, Hospital de Egas Moniz, Centro Hospitalar Lisboa Ocidental, Lisbon Portugal |                                          |                                                         | TRISP                                                                                      |

## Supplemental Online Content: Nonauthor Collaborators

\*First name, last name, and suffix (if applicable) are required and will appear in PubMed.

| *First Name and Middle Initial(s) | *Last Name | *Suffix (eg, Jr, III) | Academic Degrees | Institution                                                                                                                                 | Location (city, state/province, country) | Role or Contribution, eg, chair, principal investigator | Group (if more than 1 Group listed in the byline) and/or Subgroup (eg, Steering Committee) |
|-----------------------------------|------------|-----------------------|------------------|---------------------------------------------------------------------------------------------------------------------------------------------|------------------------------------------|---------------------------------------------------------|--------------------------------------------------------------------------------------------|
| Davide                            | Strambo    |                       | MD               | Department of Neurology, Service of Clinical Neurosciences, Lausanne University Hospital and University of Lausanne, Lausanne, Switzerland. |                                          |                                                         | TRISP                                                                                      |
| Menuela                           | Fyilviv    |                       | MD               | Department of Neurology, Service of Clinical Neurosciences, Lausanne University Hospital and University of Lausanne, Lausanne, Switzerland. |                                          |                                                         | TRISP                                                                                      |
| Naaem                             | Simaan     |                       | MD               | Department of Neurology, Hadassah-Hebrew University Medical Center                                                                          |                                          |                                                         | TRISP                                                                                      |
| Asaf                              | Honig      |                       | MD               | Department of Neurology, Hadassah-Hebrew University Medical Center                                                                          |                                          |                                                         | TRISP                                                                                      |
| Andrei                            | Filioglo   |                       | MD               | Department of Neurology, Hadassah-Hebrew University Medical Center                                                                          |                                          |                                                         | TRISP                                                                                      |
| Ilaria                            | Grisendi   |                       | MD               | Neurology Unit, Stroke Unit, Azienda Unità Sanitaria Locale - IRCCS di Reggio Emilia, Italy                                                 |                                          |                                                         | TRISP                                                                                      |
| Laura                             | Ferri      |                       | MD               | Neurology Unit, Stroke Unit, Azienda Unità Sanitaria Locale - IRCCS di Reggio Emilia, Italy                                                 |                                          |                                                         | TRISP                                                                                      |
| Maria Claudia                     | Trapasso   |                       | MD               | Neurology Unit, Stroke Unit, Azienda Unità Sanitaria Locale - IRCCS di Reggio Emilia, Italy                                                 |                                          |                                                         | TRISP                                                                                      |
| Matteo                            | Benini     |                       | MD               | Neurology Unit, Stroke Unit, Azienda Unità Sanitaria Locale - IRCCS di Reggio Emilia, Italy                                                 |                                          |                                                         | TRISP                                                                                      |
| Rosario                           | Pascarella |                       | MD               | Neuroradiology Unit, Azienda Unità Sanitaria Locale - IRCCS di Reggio Emilia, Italy                                                         |                                          |                                                         | TRISP                                                                                      |

Supplemental Online Content: Nonauthor Collaborators

\*First name, last name, and suffix (if applicable) are required and will appear in PubMed.

| *First Name and Middle Initial(s) | *Last Name | *Suffix (eg, Jr, III) | Academic Degrees | Institution                                                                                            | Location (city, state/province, country) | Role or Contribution, eg, chair, principal investigator | Group (if more than 1 Group listed in the byline) and/or Subgroup (eg, Steering Committee) |
|-----------------------------------|------------|-----------------------|------------------|--------------------------------------------------------------------------------------------------------|------------------------------------------|---------------------------------------------------------|--------------------------------------------------------------------------------------------|
| Claudio                           | Moratti    |                       | MD               | Neuroradiology Unit, Azienda Unità Sanitaria Locale - IRCCS di Reggio Emilia, Italy                    |                                          |                                                         | TRISP                                                                                      |
| Manuela                           | Napoli     |                       | MD               | Neuroradiology Unit, Azienda Unità Sanitaria Locale - IRCCS di Reggio Emilia, Italy                    |                                          |                                                         | TRISP                                                                                      |
| Sheetal                           | Sumaria    |                       | MD               | Stroke unit, University college hospitals NHS Foundation Trust                                         |                                          |                                                         | TRISP                                                                                      |
| Klaus                             | Gröschel   |                       | MD               | Department of Neurology, University Medical Center of the Johannes Gutenberg University Mainz, Germany |                                          |                                                         | TRISP                                                                                      |
| Marianne                          | Hahn       |                       | MD               | Department of Neurology, University Medical Center of the Johannes Gutenberg University Mainz, Germany |                                          |                                                         | TRISP                                                                                      |
| Alexandros                        | Tsp}qivmw  |                       | MD               | Department of Neurology and Stroke Center, University Hospital Basel, Switzerland                      |                                          |                                                         | TRISP                                                                                      |
| Christopher                       | Traenka    |                       | MD               | Hitevxqirx\$sj\$Riyvspk}\$erh\$Girxiv0\$Yrmzivwmx}\$Lswtmxep\$Fewip0\$W{mx~ivperh                      |                                          |                                                         | TRISP                                                                                      |
| Annaelle                          | Zietz      |                       | MD               | Hitevxqirx\$sj\$Riyvspk}\$erh\$Girxiv0\$Yrmzivwmx}\$Lswtmxep\$Fewip0\$W{mx~ivperh                      |                                          |                                                         | TRISP                                                                                      |
| Philippe                          | Lyrer      |                       | MD               | Hitevxqirx\$sj\$Riyvspk}\$erh\$Girxiv0\$Yrmzivwmx}\$Lswtmxep\$Fewip0\$W{mx~ivperh                      |                                          |                                                         | TRISP                                                                                      |
| Gian Marco                        | DeMarchis  |                       | MD               | Hitevxqirx\$sj\$Riyvspk}\$erh\$Girxiv0\$Yrmzivwmx}\$Lswtmxep\$Fewip0\$W{mx~ivperh                      |                                          |                                                         | TRISP                                                                                      |
| Sebastian                         | Thilemann  |                       | MD               | Hitevxqirx\$sj\$Riyvspk}\$erh\$Girxiv0\$Yrmzivwmx}\$Lswtmxep\$Fewip0\$W{mx~ivperh                      |                                          |                                                         | TRISP                                                                                      |

Supplemental Online Content: Nonauthor Collaborators

\*First name, last name, and suffix (if applicable) are required and will appear in PubMed.

| *First Name and Middle Initial(s) | *Last Name | *Suffix (eg, Jr, III) | Academic Degrees | Institution                                                                                           | Location (city, state/province, country) | Role or Contribution, eg, chair, principal investigator | Group (if more than 1 Group listed in the byline) and/or Subgroup (eg, Steering Committee) |
|-----------------------------------|------------|-----------------------|------------------|-------------------------------------------------------------------------------------------------------|------------------------------------------|---------------------------------------------------------|--------------------------------------------------------------------------------------------|
| Ines                              | Piot       |                       | MD               | Hitevxqirx\$sj\$Riyvspk}\$erh\$Girxiv0\$Yrmzivwmx}\$Lswtmxep\$Fewip0\$W{mx~ivperh                     |                                          |                                                         | TRISP                                                                                      |
| Lukas                             | Enz        |                       | MD               | Hitevxqirx\$sj\$Riyvspk}\$erh\$Girxiv0\$Yrmzivwmx}\$Lswtmxep\$Fewip0\$W{mx~ivperh                     |                                          |                                                         | TRISP                                                                                      |
| Nils                              | Peters     |                       | MD               | Hitevxqirx\$sj\$Riyvspk}\$erh\$Girxiv0\$Yrmzivwmx}\$Lswtmxep\$Fewip0\$W{mx~ivperh                     |                                          |                                                         | TRISP                                                                                      |
| Mira                              | Katan      |                       | MD               | Hitevxqirx\$sj\$Riyvspk}\$erh\$Girxiv0\$Yrmzivwmx}\$Lswtmxep\$Fewip0\$W{mx~ivperh                     |                                          |                                                         | TRISP                                                                                      |
| Alexander                         | Brehm      |                       | MD               | Hmekrswxmg\$erh\$MrxivziRiyvsvehmspsk}\$0\$Wxvsoi\$Girxiv0\$Yrmzivwmx}\$Lswtmxep\$Fewip0\$W{mx~ivperh |                                          |                                                         | TRISP                                                                                      |
| Marios                            | Psychogios |                       | MD               | Hmekrswxmg\$erh\$MrxivziRiyvsvehmspsk}\$0\$Wxvsoi\$Girxiv0\$Yrmzivwmx}\$Lswtmxep\$Fewip0\$W{mx~ivperh |                                          |                                                         | TRISP                                                                                      |
| Ulrike                            | Prange     |                       | MD               | Department of Neurology, Inselspital, Bern University Hospital, and University of Bern, Switzerland.  |                                          |                                                         | DOAC-IVT                                                                                   |
| Neil                              | Spratt     |                       | MD               | Department of Neurology, John Hunter Hospital, NSW, Australia                                         |                                          |                                                         | TRISP                                                                                      |
| Laurent                           | Roten      |                       | MD               | Department of Cardiology, Inselspital, Bern University Hospital, and University of Bern, Switzerland. |                                          |                                                         | DOAC-IVT                                                                                   |
| BL Alvin                          | Chew       |                       | MD               | Department of Neurology, John Hunter Hospital, NSW, Australia                                         |                                          |                                                         | DOAC-IVT                                                                                   |

## Supplemental Online Content: Nonauthor Collaborators

\*First name, last name, and suffix (if applicable) are required and will appear in PubMed.

| *First Name and Middle Initial(s) | *Last Name     | *Suffix (eg, Jr, III) | Academic Degrees | Institution                                                                                                                                          | Location (city, state/province, country) | Role or Contribution, eg, chair, principal investigator | Group (if more than 1 Group listed in the byline) and/or Subgroup (eg, Steering Committee) |
|-----------------------------------|----------------|-----------------------|------------------|------------------------------------------------------------------------------------------------------------------------------------------------------|------------------------------------------|---------------------------------------------------------|--------------------------------------------------------------------------------------------|
| Jakub                             | Stefela        |                       | MD               | Department of Neurology, Inselspital, Bern University Hospital, and University of Bern, Switzerland.                                                 |                                          |                                                         | DOAC-IVT                                                                                   |
| Regina                            | von Rennenberg |                       | MD               | Department of Neurology with Experimental Neurology, Charité-Universitätsmedizin Berlin and Center for Stroke Research Berlin (CSB), Berlin, Germany |                                          |                                                         | TRISP                                                                                      |
| Simon                             | Litmeier       |                       | MD               | Department of Neurology with Experimental Neurology, Charité-Universitätsmedizin Berlin and Center for Stroke Research Berlin (CSB), Berlin, Germany |                                          |                                                         | TRISP                                                                                      |
| Christoph                         | Riegler        |                       | MD               | Department of Neurology with Experimental Neurology, Charité-Universitätsmedizin Berlin and Center for Stroke Research Berlin (CSB), Berlin, Germany |                                          |                                                         | TRISP                                                                                      |
| Markus                            | Klammer        |                       | MD               | Department of Neurology with Experimental Neurology, Charité-Universitätsmedizin Berlin and Center for Stroke Research Berlin (CSB), Berlin, Germany |                                          |                                                         | TRISP                                                                                      |
| Hebun                             | Erdur          |                       | MD               | Department of Neurology with Experimental Neurology, Charité-Universitätsmedizin Berlin and Center for Stroke Research Berlin (CSB), Berlin, Germany |                                          |                                                         | TRISP                                                                                      |
| Hellwig                           | Simon          |                       | MD               | Department of Neurology with Experimental Neurology, Charité-Universitätsmedizin Berlin and Center for Stroke Research Berlin (CSB), Berlin, Germany |                                          |                                                         | TRISP                                                                                      |

## Supplemental Online Content: Nonauthor Collaborators

\*First name, last name, and suffix (if applicable) are required and will appear in PubMed.

| *First Name and Middle Initial(s) | *Last Name  | *Suffix (eg, Jr, III) | Academic Degrees | Institution                                                                                                | Location (city, state/province, country) | Role or Contribution, eg, chair, principal investigator | Group (if more than 1 Group listed in the byline) and/or Subgroup (eg, Steering Committee) |
|-----------------------------------|-------------|-----------------------|------------------|------------------------------------------------------------------------------------------------------------|------------------------------------------|---------------------------------------------------------|--------------------------------------------------------------------------------------------|
| Magoni                            | Mauro       |                       | MD               | Department of Neurological Sciences and Vision, ASST Spedali Civili, Brescia                               |                                          |                                                         | TRISP                                                                                      |
| Longoni                           | Marco       |                       | MD               | Department of Neuroscience, Neurology and Stroke Unit                                                      |                                          |                                                         | TRISP                                                                                      |
| Cordici                           | Francesco   |                       | MD               | Department of Neuroscience, Neurology and Stroke Unit                                                      |                                          |                                                         | TRISP                                                                                      |
| Biguzzi                           | Sara        |                       | MD               | Department of Neuroscience, Neurology and Stroke Unit                                                      |                                          |                                                         | TRISP                                                                                      |
| Peter                             | Tan         |                       | MD               | Department of Neuroscience, Eastern Health, VIC, Australia                                                 |                                          |                                                         | TRISP                                                                                      |
| Marko                             | Ercegovac   |                       | MD               | Neurology Clinic, Clinical Centre of Serbia, Faculty of Medicine, University of Belgrade, Belgrade, Serbia |                                          |                                                         | TRISP                                                                                      |
| Ivana                             | Berisavac   |                       | MD               | Neurology Clinic, Clinical Centre of Serbia, Faculty of Medicine, University of Belgrade, Belgrade, Serbia |                                          |                                                         | TRISP                                                                                      |
| David                             | Hauptenthal |                       | MD               | University Hospital Erlangen, Department of Neurology, Erlangen, Germany                                   |                                          |                                                         | TRISP                                                                                      |
| Luise                             | Gassmann    |                       | MD               | University Hospital Erlangen, Department of Neurology, Erlangen, Germany                                   |                                          |                                                         | TRISP                                                                                      |
| Armin                             | Marsch      |                       | MD               | University Hospital Erlangen, Department of Neurology, Erlangen, Germany                                   |                                          |                                                         | TRISP                                                                                      |
| Gabriela                          | Siedler     |                       | MD               | University Hospital Erlangen, Department of Neurology, Erlangen, Germany                                   |                                          |                                                         | TRISP                                                                                      |

## Supplemental Online Content: Nonauthor Collaborators

\*First name, last name, and suffix (if applicable) are required and will appear in PubMed.

| *First Name and Middle Initial(s) | *Last Name     | *Suffix (eg, Jr, III) | Academic Degrees | Institution                                                                                                                                           | Location (city, state/province, country) | Role or Contribution, eg, chair, principal investigator | Group (if more than 1 Group listed in the byline) and/or Subgroup (eg, Steering Committee) |
|-----------------------------------|----------------|-----------------------|------------------|-------------------------------------------------------------------------------------------------------------------------------------------------------|------------------------------------------|---------------------------------------------------------|--------------------------------------------------------------------------------------------|
| Louise                            | Weir           |                       | MD               | Department of Medicine and Neurology, Melbourne Brain Centre at the Royal Melbourne Hospital, University of Melbourne, Parkville, Victoria, Australia |                                          |                                                         | DOAC-IVT                                                                                   |
| Lauren                            | Pesavento      |                       | MD               | Department of Medicine and Neurology, Melbourne Brain Centre at the Royal Melbourne Hospital, University of Melbourne, Parkville, Victoria, Australia |                                          |                                                         | DOAC-IVT                                                                                   |
| Nawaf                             | Yassi          |                       | MD               | Department of Medicine and Neurology, Melbourne Brain Centre at the Royal Melbourne Hospital, University of Melbourne, Parkville, Victoria, Australia |                                          |                                                         | DOAC-IVT                                                                                   |
| Stephen                           | Davis          |                       | MD               | Department of Medicine and Neurology, Melbourne Brain Centre at the Royal Melbourne Hospital, University of Melbourne, Parkville, Victoria, Australia |                                          |                                                         | DOAC-IVT                                                                                   |
| Bonaventure                       | Ip             |                       | MD               | Department of Medicine and Therapeutics, Prince of Wales Hospital, The Chinese University of Hong Kong, Hong Kong.                                    |                                          |                                                         | DOAC-IVT                                                                                   |
| Thomas                            | Leung          |                       | MD               | Department of Medicine and Therapeutics, Prince of Wales Hospital, The Chinese University of Hong Kong, Hong Kong.                                    |                                          |                                                         | DOAC-IVT                                                                                   |
| Alexandra                         | Gomez-Exposito |                       | MD               | Department of Neurology & Stroke. University of Tübingen, Tübingen, Germany                                                                           |                                          |                                                         | DOAC-IVT                                                                                   |
| Joshua                            | Mbroh          |                       | MD               | Department of Neurology & Stroke. University of Tübingen, Tübingen, Germany                                                                           |                                          |                                                         | DOAC-IVT                                                                                   |



## Supplemental Online Content: Nonauthor Collaborators

\*First name, last name, and suffix (if applicable) are required and will appear in PubMed.

| *First Name and Middle Initial(s) | *Last Name | *Suffix (eg, Jr, III) | Academic Degrees | Institution                                                                                                                                                                | Location (city, state/province, country) | Role or Contribution, eg, chair, principal investigator | Group (if more than 1 Group listed in the byline) and/or Subgroup (eg, Steering Committee) |
|-----------------------------------|------------|-----------------------|------------------|----------------------------------------------------------------------------------------------------------------------------------------------------------------------------|------------------------------------------|---------------------------------------------------------|--------------------------------------------------------------------------------------------|
| Johannes                          | Tünnerhoff |                       | MD               | Department of Neurology & Stroke. University of Tübingen, Tübingen, Germany                                                                                                |                                          |                                                         | DOAC-IVT                                                                                   |
| Gabriel                           | Barbu      |                       | MD               | Department of Neurology & Stroke. University of Tübingen, Tübingen, Germany                                                                                                |                                          |                                                         | DOAC-IVT                                                                                   |
| Yi                                | Wang       |                       | MD               | Department of Neurology & Stroke. University of Tübingen, Tübingen, Germany                                                                                                |                                          |                                                         | DOAC-IVT                                                                                   |
| Annerose                          | Mengel     |                       | MD               | Department of Neurology & Stroke. University of Tübingen, Tübingen, Germany                                                                                                |                                          |                                                         | DOAC-IVT                                                                                   |
| Feil                              | Katharina  |                       | MD               | Department of Neurology & Stroke. University of Tübingen, Tübingen, Germany                                                                                                |                                          |                                                         | DOAC-IVT                                                                                   |
| Markus                            | Kowarik    |                       | MD               | Department of Neurology & Stroke. University of Tübingen, Tübingen, Germany                                                                                                |                                          |                                                         | DOAC-IVT                                                                                   |
| Ulf                               | Ziemann    |                       | MD               | Department of Neurology & Stroke. University of Tübingen, Tübingen, Germany                                                                                                |                                          |                                                         | DOAC-IVT                                                                                   |
| Jun Yup                           | Kim        |                       | MD               | Department of Neurology and Cerebrovascular Center, Seoul National University Bundang Hospital, Seoul National University College of Medicine, Seongnam, Republic of Korea |                                          |                                                         | CRCS-K-NIH                                                                                 |
| Jihoon                            | Kang       |                       | MD               | Department of Neurology and Cerebrovascular Center, Seoul National University Bundang Hospital, Seoul National University College of Medicine, Seongnam, Republic of Korea |                                          |                                                         | CRCS-K-NIH                                                                                 |

## Supplemental Online Content: Nonauthor Collaborators

\*First name, last name, and suffix (if applicable) are required and will appear in PubMed.

| *First Name and Middle Initial(s) | *Last Name | *Suffix (eg, Jr, III) | Academic Degrees | Institution                                                                                                                                                                | Location (city, state/province, country) | Role or Contribution, eg, chair, principal investigator | Group (if more than 1 Group listed in the byline) and/or Subgroup (eg, Steering Committee) |
|-----------------------------------|------------|-----------------------|------------------|----------------------------------------------------------------------------------------------------------------------------------------------------------------------------|------------------------------------------|---------------------------------------------------------|--------------------------------------------------------------------------------------------|
| Moon-Ku                           | Han        |                       | MD               | Department of Neurology and Cerebrovascular Center, Seoul National University Bundang Hospital, Seoul National University College of Medicine, Seongnam, Republic of Korea |                                          |                                                         | CRCS-K-NIH                                                                                 |
| Beom Joon                         | Kim        |                       | MD               | Department of Neurology and Cerebrovascular Center, Seoul National University Bundang Hospital, Seoul National University College of Medicine, Seongnam, Republic of Korea |                                          |                                                         | CRCS-K-NIH                                                                                 |
| Kang-Ho                           | Choi       |                       | MD               | Department of Neurology, Chonnam National University Hospital, Gwangju, Republic of Korea                                                                                  |                                          |                                                         | CRCS-K-NIH                                                                                 |
| Man-Seok                          | Park       |                       | MD               | Department of Neurology, Chonnam National University Hospital, Gwangju, Republic of Korea                                                                                  |                                          |                                                         | CRCS-K-NIH                                                                                 |
| Ki-Hyun                           | Cho        |                       | MD               | Department of Neurology, Chonnam National University Hospital, Gwangju, Republic of Korea                                                                                  |                                          |                                                         | CRCS-K-NIH                                                                                 |
| Joon-Tae                          | Kim        |                       | MD               | Department of Neurology, Chonnam National University Hospital, Gwangju, Republic of Korea                                                                                  |                                          |                                                         | CRCS-K-NIH                                                                                 |
| Dong-Ick                          | Shin       |                       | MD               | Department of Neurology, Chungbuk National University Hospital, Cheongju, Republic of Korea                                                                                |                                          |                                                         | CRCS-K-NIH                                                                                 |

## Supplemental Online Content: Nonauthor Collaborators

\*First name, last name, and suffix (if applicable) are required and will appear in PubMed.

| *First Name and Middle Initial(s) | *Last Name | *Suffix (eg, Jr, III) | Academic Degrees | Institution                                                                                                                | Location (city, state/province, country) | Role or Contribution, eg, chair, principal investigator | Group (if more than 1 Group listed in the byline) and/or Subgroup (eg, Steering Committee) |
|-----------------------------------|------------|-----------------------|------------------|----------------------------------------------------------------------------------------------------------------------------|------------------------------------------|---------------------------------------------------------|--------------------------------------------------------------------------------------------|
| Kyu Sun                           | Yum        |                       | MD               | Department of Neurology, Chungbuk National University Hospital, Cheongju, Republic of Korea                                |                                          |                                                         | CRCS-K-NIH                                                                                 |
| Dae-Hyun                          | Kim        |                       | MD               | Department of Neurology, Dong-A University Hospital, Dong-A University College of Medicine, Busan, Republic of Korea       |                                          |                                                         | CRCS-K-NIH                                                                                 |
| Jae-Kwan                          | Cha        |                       | MD               | Department of Neurology, Dong-A University Hospital, Dong-A University College of Medicine, Busan, Republic of Korea       |                                          |                                                         | CRCS-K-NIH                                                                                 |
| Jong-Moo                          | Park       |                       | MD               | Department of Neurology, Uijeongbu Eulji Medical Center, Eulji University School of Medicine, Uijeongbu, Republic of Korea |                                          |                                                         | CRCS-K-NIH                                                                                 |
| Kyusik                            | Kang       |                       | MD               | Department of Neurology, Nowon Eulji Medical Center, Eulji University School of Medicine, Seoul, Republic of Korea         |                                          |                                                         | CRCS-K-NIH                                                                                 |
| Yong Soo                          | Kim        |                       | MD               | Department of Neurology, Nowon Eulji Medical Center, Eulji University School of Medicine, Seoul, Republic of Korea         |                                          |                                                         | CRCS-K-NIH                                                                                 |
| Jae Guk                           | Kim        |                       | MD               | Department of Neurology, Daejeon Eulji Medical Center, Eulji University School of Medicine, Daejeon, Republic of Korea     |                                          |                                                         | CRCS-K-NIH                                                                                 |
| Soo Joo                           | Lee        |                       | MD               | Department of Neurology, Daejeon Eulji Medical Center, Eulji University School of Medicine, Daejeon, Republic of Korea     |                                          |                                                         | CRCS-K-NIH                                                                                 |

## Supplemental Online Content: Nonauthor Collaborators

\*First name, last name, and suffix (if applicable) are required and will appear in PubMed.

| *First Name and Middle Initial(s) | *Last Name | *Suffix (eg, Jr, III) | Academic Degrees | Institution                                                                                                                      | Location (city, state/province, country) | Role or Contribution, eg, chair, principal investigator | Group (if more than 1 Group listed in the byline) and/or Subgroup (eg, Steering Committee) |
|-----------------------------------|------------|-----------------------|------------------|----------------------------------------------------------------------------------------------------------------------------------|------------------------------------------|---------------------------------------------------------|--------------------------------------------------------------------------------------------|
| Mi-Sun                            | Oh         |                       | MD               | Department of Neurology, Hallym University Sacred Heart Hospital, Anyang, Republic of Korea                                      |                                          |                                                         | CRCS-K-NIH                                                                                 |
| Byung-Chul                        | Lee        |                       | MD               | Department of Neurology, Hallym University Sacred Heart Hospital, Anyang, Republic of Korea                                      |                                          |                                                         | CRCS-K-NIH                                                                                 |
| Minwoo                            | Lee        |                       | MD               | Department of Neurology, Hallym University Sacred Heart Hospital, Anyang, Republic of Korea                                      |                                          |                                                         | CRCS-K-NIH                                                                                 |
| Kyung-Ho                          | Yu         |                       | MD               | Department of Neurology, Hallym University Sacred Heart Hospital, Anyang, Republic of Korea                                      |                                          |                                                         | CRCS-K-NIH                                                                                 |
| Hong-Kyun                         | Park       |                       | MD               | Department of Neurology, Inje University Ilsan Paik Hospital, Inje University College of Medicine, Goyang, Republic of Korea     |                                          |                                                         | CRCS-K-NIH                                                                                 |
| Keun-Sik                          | Hong       |                       | MD               | Department of Neurology, Inje University Ilsan Paik Hospital, Inje University College of Medicine, Goyang, Republic of Korea     |                                          |                                                         | CRCS-K-NIH                                                                                 |
| Yong-Jin                          | Cho        |                       | MD               | Department of Neurology, Inje University Ilsan Paik Hospital, Inje University College of Medicine, Goyang, Republic of Korea     |                                          |                                                         | CRCS-K-NIH                                                                                 |
| Jay Chol                          | Choi       |                       | MD               | Department of Neurology, Jeju National University Hospital, Jeju National University School of Medicine, Jeju, Republic of Korea |                                          |                                                         | CRCS-K-NIH                                                                                 |
| Joong-Goo                         | Kim        |                       | MD               | Department of Neurology, Jeju National University Hospital, Jeju National University School of Medicine, Jeju, Republic of Korea |                                          |                                                         | CRCS-K-NIH                                                                                 |

## Supplemental Online Content: Nonauthor Collaborators

\*First name, last name, and suffix (if applicable) are required and will appear in PubMed.

| *First Name and Middle Initial(s) | *Last Name | *Suffix (eg, Jr, III) | Academic Degrees | Institution                                                                                                                      | Location (city, state/province, country) | Role or Contribution, eg, chair, principal investigator | Group (if more than 1 Group listed in the byline) and/or Subgroup (eg, Steering Committee) |
|-----------------------------------|------------|-----------------------|------------------|----------------------------------------------------------------------------------------------------------------------------------|------------------------------------------|---------------------------------------------------------|--------------------------------------------------------------------------------------------|
| Chul-Hoo                          | Kang       |                       | MD               | Department of Neurology, Jeju National University Hospital, Jeju National University School of Medicine, Jeju, Republic of Korea |                                          |                                                         | CRCS-K-NIH                                                                                 |
| Sung Il                           | Sohn       |                       | MD               | Department of Neurology, Keimyung University Dongsan Medical Center, Daegu, Republic of Korea                                    |                                          |                                                         | CRCS-K-NIH                                                                                 |
| Jeong-Ho                          | Hong       |                       | MD               | Department of Neurology, Keimyung University Dongsan Medical Center, Daegu, Republic of Korea                                    |                                          |                                                         | CRCS-K-NIH                                                                                 |
| Seong Hwa                         | Jang       |                       | MD               | Department of Neurology, Keimyung University Dongsan Medical Center, Daegu, Republic of Korea                                    |                                          |                                                         | CRCS-K-NIH                                                                                 |
| Hyungjong                         | Park       |                       | MD               | Department of Neurology, Keimyung University Dongsan Medical Center, Daegu, Republic of Korea                                    |                                          |                                                         | CRCS-K-NIH                                                                                 |
| Tai Hwan                          | Park       |                       | MD               | Department of Neurology, Seoul Medical Center, Seoul, Republic of Korea                                                          |                                          |                                                         | CRCS-K-NIH                                                                                 |
| Sang-Soon                         | Park       |                       | MD               | Department of Neurology, Seoul Medical Center, Seoul, Republic of Korea                                                          |                                          |                                                         | CRCS-K-NIH                                                                                 |
| Kyung Bok                         | Lee        |                       | MD               | Department of Neurology, Soonchunhyang University Hospital, Seoul, Republic of Korea                                             |                                          |                                                         | CRCS-K-NIH                                                                                 |
| Jee-Hyun                          | Kwon       |                       | MD               | Department of Neurology, Ulsan University Hospital, Ulsan University College of Medicine, Ulsan, Republic of Korea               |                                          |                                                         | CRCS-K-NIH                                                                                 |

## Supplemental Online Content: Nonauthor Collaborators

\*First name, last name, and suffix (if applicable) are required and will appear in PubMed.

| *First Name and Middle Initial(s) | *Last Name | *Suffix (eg, Jr, III) | Academic Degrees | Institution                                                                                                           | Location (city, state/province, country) | Role or Contribution, eg, chair, principal investigator | Group (if more than 1 Group listed in the byline) and/or Subgroup (eg, Steering Committee) |
|-----------------------------------|------------|-----------------------|------------------|-----------------------------------------------------------------------------------------------------------------------|------------------------------------------|---------------------------------------------------------|--------------------------------------------------------------------------------------------|
| Wook-Joo                          | Kim        |                       | MD               | Department of Neurology, Ulsan University Hospital, Ulsan University College of Medicine, Ulsan, Republic of Korea    |                                          |                                                         | CRCS-K-NIH                                                                                 |
| Jun                               | Lee        |                       | MD               | Department of Neurology, Yeungnam University Hospital, Daegu, Republic of Korea                                       |                                          |                                                         | CRCS-K-NIH                                                                                 |
| Doo Hyuk                          | Kwon       |                       | MD               | Department of Neurology, Yeungnam University Hospital, Daegu, Republic of Korea                                       |                                          |                                                         | CRCS-K-NIH                                                                                 |
| Dong-Seok                         | Gwak       |                       | MD               | Department of Neurology, Dongguk University Ilsan Hospital, Goyang, Republic of Korea                                 |                                          |                                                         | CRCS-K-NIH                                                                                 |
| Dong-Eog                          | Kim        |                       | MD               | Department of Neurology, Dongguk University Ilsan Hospital, Goyang, Republic of Korea                                 |                                          |                                                         | CRCS-K-NIH                                                                                 |
| Keon-Joo                          | Lee        |                       | MD               | Department of Neurology, Korea University Guro Hospital, Seoul, Republic of Korea                                     |                                          |                                                         | CRCS-K-NIH                                                                                 |
| Sang-Hwa                          | Lee        |                       | MD               | Department of Neurology, Hallym University-Chuncheon Sacred Heart Hospital, Chuncheon, Gangwon-Do, Republic of Korea. |                                          |                                                         | CRCS-K-NIH                                                                                 |
| Chulho                            | Kim        |                       | MD               | Department of Neurology, Hallym University-Chuncheon Sacred Heart Hospital, Chuncheon, Gangwon-Do, Republic of Korea. |                                          |                                                         | CRCS-K-NIH                                                                                 |
| Hae-Bong                          | Jeong      |                       | MD               | Department of Neurology, Chung-Ang University Hospital, Seoul, Republic of Korea                                      |                                          |                                                         | CRCS-K-NIH                                                                                 |
| Kwang Yeol                        | Park       |                       | MD               | Department of Neurology, Chung-Ang University Hospital, Seoul, Republic of Korea                                      |                                          |                                                         | CRCS-K-NIH                                                                                 |

## Supplemental Online Content: Nonauthor Collaborators

\*First name, last name, and suffix (if applicable) are required and will appear in PubMed.

| *First Name and Middle Initial(s) | *Last Name        | *Suffix (eg, Jr, III) | Academic Degrees | Institution                                                                                                                        | Location (city, state/province, country) | Role or Contribution, eg, chair, principal investigator | Group (if more than 1 Group listed in the byline) and/or Subgroup (eg, Steering Committee) |
|-----------------------------------|-------------------|-----------------------|------------------|------------------------------------------------------------------------------------------------------------------------------------|------------------------------------------|---------------------------------------------------------|--------------------------------------------------------------------------------------------|
| Ji Sung                           | Lee               |                       | MD               | Clinical Research Center, Asan Medical Center, Seoul, Republic of Korea                                                            |                                          |                                                         | CRCS-K-NIH                                                                                 |
| Juneyoung                         | Lee               |                       | MD               | Department of Biostatistics, Korea University College of Medicine, Seoul, Republic of Korea                                        |                                          |                                                         | CRCS-K-NIH                                                                                 |
| Nicolas                           | Martinez-Majander |                       | MD               | Neurology, University of Helsinki and Helsinki University Hospital, Helsinki, Finland                                              |                                          |                                                         | TRISP                                                                                      |
| Gerli                             | Sibolt            |                       | MD               | Neurology, University of Helsinki and Helsinki University Hospital, Helsinki, Finland                                              |                                          |                                                         | TRISP                                                                                      |
| Marjaana                          | Tiainen           |                       | MD               | Neurology, University of Helsinki and Helsinki University Hospital, Helsinki, Finland                                              |                                          |                                                         | TRISP                                                                                      |
| Mauro                             | Gentile           |                       | MD               | IRCCS Istituto Delle Scienze Neurologiche Di Bologna, Department of Neurology and Stroke Center, Maggiore Hospital, Bologna, Italy |                                          |                                                         | TRISP                                                                                      |
| Ludovica                          | Migliaccio        |                       | MD               | IRCCS Istituto Delle Scienze Neurologiche Di Bologna, Department of Neurology and Stroke Center, Maggiore Hospital, Bologna, Italy |                                          |                                                         | TRISP                                                                                      |
| Luigi                             | Simonetti         |                       | MD               | IRCCS Istituto Delle Scienze Neurologiche Di Bologna, Department of Neuroradiology, Maggiore Hospital, Bologna, Italy              |                                          |                                                         | TRISP                                                                                      |

## Supplemental Online Content: Nonauthor Collaborators

\*First name, last name, and suffix (if applicable) are required and will appear in PubMed.

| *First Name and Middle Initial(s) | *Last Name | *Suffix (eg, Jr, III) | Academic Degrees | Institution                                                                                                                        | Location (city, state/province, country) | Role or Contribution, eg, chair, principal investigator | Group (if more than 1 Group listed in the byline) and/or Subgroup (eg, Steering Committee) |
|-----------------------------------|------------|-----------------------|------------------|------------------------------------------------------------------------------------------------------------------------------------|------------------------------------------|---------------------------------------------------------|--------------------------------------------------------------------------------------------|
| Matteo                            | Paolucci   |                       | MD               | IRCCS Istituto Delle Scienze Neurologiche Di Bologna, Department of Neurology and Stroke Center, Maggiore Hospital, Bologna, Italy |                                          |                                                         | TRISP                                                                                      |
| Alan                              | Flores     |                       | MD               | Stroke Unit. Neurology department. Hospital Universitari Joan XXIII of Tarragona. Spain                                            |                                          |                                                         | TRISP                                                                                      |
| Laia                              | Seró       |                       | MD               | Stroke Unit. Neurology department. Hospital Universitari Joan XXIII of Tarragona. Spain                                            |                                          |                                                         | TRISP                                                                                      |
| Guillaume                         | Turc       |                       | MD               | Neurology Department, GHU Paris Psychiatrie et Neurosciences, INSERM U1266                                                         |                                          |                                                         | TRISP                                                                                      |
| Catherine                         | Oppenheim  |                       | MD               | Neuroradiology Department, GHU Paris Psychiatrie et Neurosciences, INSERM U1266                                                    |                                          |                                                         | TRISP                                                                                      |
| Olivier                           | Naggara    |                       | MD               | Neuroradiology Department, GHU Paris Psychiatrie et Neurosciences, INSERM U1266                                                    |                                          |                                                         | TRISP                                                                                      |
| Wagih                             | Ben Hassen |                       | MD               | Neuroradiology Department, GHU Paris Psychiatrie et Neurosciences, INSERM U1266                                                    |                                          |                                                         | TRISP                                                                                      |
| Joseph                            | Benzakoun  |                       | MD               | Neuroradiology Department, GHU Paris Psychiatrie et Neurosciences, INSERM U1266                                                    |                                          |                                                         | TRISP                                                                                      |
| Yusuke                            | Yakushiji  |                       | MD               | Department of Neurology, Kansai Medical University Faculty of Medicine, Hirakata, Japan                                            |                                          |                                                         | DOAC-IVT                                                                                   |
| Takenobu                          | Kunieda    |                       | MD               | Department of Neurology, Kansai Medical University Faculty of Medicine, Hirakata, Japan                                            |                                          |                                                         | DOAC-IVT                                                                                   |
