# Supplementary material for: Intravenous Thrombolysis in Patients With Ischemic Stroke and Recent Ingestion of Direct Oral Anticoagulants
Source: PubMed Central journal article supplement (PMC9857462; doi:10.1001/jamaneurol.2022.4782), 2023-01-03
Supplement: jamaneurol-e224782-s003.pdf [file jamaneurol-e224782-s003.pdf]

## Data Sharing Statement

Meinel. Intravenous Thrombolysis in Patients With Ischemic Stroke and Recent Ingestion of Direct Oral Anticoagulants. *JAMA Neurol*. Published January 03, 2023.

doi:10.1001/jamaneurol.2022.4782

### Data

**Data available:** Yes

**Data types:** Deidentified participant data

**How to access data:** Data from this trial are currently not publicly available. We will share anonymized data upon reasonable request from any qualified investigator after clearance by the local ethics committee. A request for access to the data can be made by sending an email together with a research plan to [david.seiffge@insel.ch](mailto:david.seiffge@insel.ch).

**When available:** With publication

### Supporting Documents

**Document types:** None

### Additional Information

**Who can access the data:** qualified investigator after clearance by the local ethics committee

**Types of analyses:** any purpose

**Mechanisms of data availability:** without investigator support and after approval of a proposal and a signed data access agreement

**Any additional restrictions:** Swiss law, law of participating centers and regulations of respective ethics committees.
